# Supplementary material for: A novel CT-responsive hydrogel for the construction of an organ simulation phantom for the repeatability and stability study of radiomic features
Source: Royal Society of Chemistry journal article supplement (doi:10.1039/d3tb01706k), 2023-01-01
Supplement: d3tb01706k1.pdf [file d3tb01706k1.pdf]

## Supporting Information

### CT adjustability and CT uniformity

**Tab. S1 Formulation Tab.of CT values of CT/PAA-Ca hydrogel and aqueous solution**

| Ca (wt%) | CT <sub>hyd</sub> value (HU) | SD (HU) | CT <sub>wat</sub> Value (HU) | SD (HU) |
|----------|------------------------------|---------|------------------------------|---------|
| 0.000    | 25.78                        | 22.79   | -11.66                       | 20.61   |
| 0.013    | 34.60                        | 25.23   | -7.67                        | 20.10   |
| 0.132    | 35.33                        | 25.90   | 0.13                         | 21.06   |
| 0.263    | 50.27                        | 25.91   | 21.88                        | 21.90   |
| 0.648    | 65.45                        | 23.13   | 61.30                        | 22.93   |
| 2.419    | 174.38                       | 26.74   | 136.63                       | 21.92   |
| 4.443    | 300.27                       | 22.19   | 267.28                       | 19.50   |

**Tab. S2 Change Tab.of CT value of calcium ion in CT/PAA-Fe-Ca hydrogel**

| Fe(wt%) | Ca (wt%) | Mean CT (HU) | SD (HU) |
|---------|----------|--------------|---------|
| 0.046   | 0.060    | 49.92        | 14.21   |
| 0.046   | 0.237    | 60.84        | 26.81   |
| 0.046   | 0.587    | 82.95        | 28.91   |
| 0.046   | 1.154    | 101.35       | 23.79   |
| 0.046   | 2.237    | 167.58       | 27.21   |
| 0.046   | 3.254    | 227.15       | 16.64   |
| 0.046   | 4.212    | 278.06       | 18.23   |

**Tab. S3 Water absorption and CT value of CT/PAA-Ca hydrogel**

| Calcium content (wt%) | Water content (wt%) | water absorption 0days(g/g) | water absorption 14days(g/g) | water absorption 28days(g/g) | Mean CT(HU) | SD(HU) |
|-----------------------|---------------------|-----------------------------|------------------------------|------------------------------|-------------|--------|
| 0.000                 | 86.73               | 0.496                       | 0.413                        | 0.353                        | 25.78       | 22.79  |
| 0.013                 | 86.24               | 1.579                       | 1.367                        | 1.292                        | 34.6        | 25.23  |
| 0.132                 | 85.84               | 5.22                        | 4.922                        | 4.583                        | 35.33       | 23.9   |
| 0.648                 | 84.42               | 2.608                       | 2.441                        | 2.276                        | 65.45       | 24.91  |
| 2.419                 | 78.97               | 1.276                       | 1.147                        | 1.093                        | 174.38      | 22.19  |

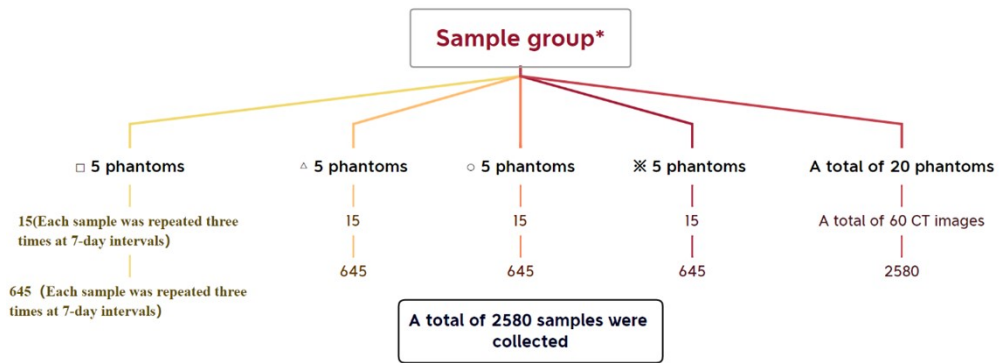

**Fig. S1** Sample grouping process

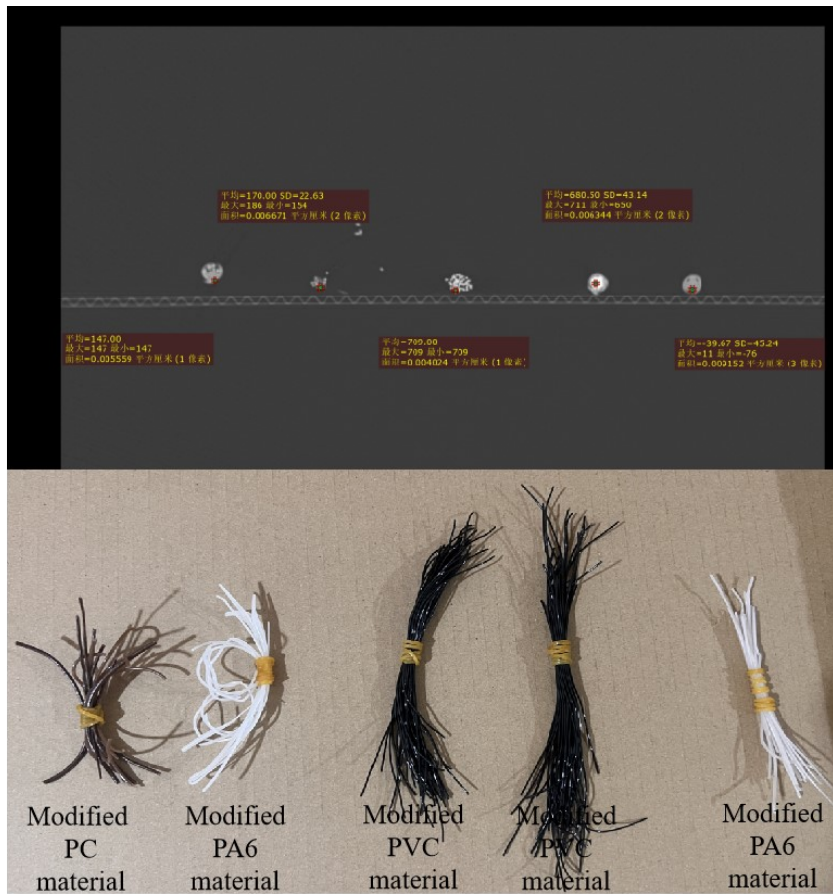

**Fig.S2** CT and physical images of various modified materials

**Tab.S4.** CT value of various modified materials

|           | 1           | 2              | 3            | 4            | 5              |
|-----------|-------------|----------------|--------------|--------------|----------------|
| Materials | Modified PC | Modified PA6-1 | Modified PVC | Modified PVC | Modified PA6-2 |
| CT (HU)   | 147         | 170            | 709          | 680          | 39             |

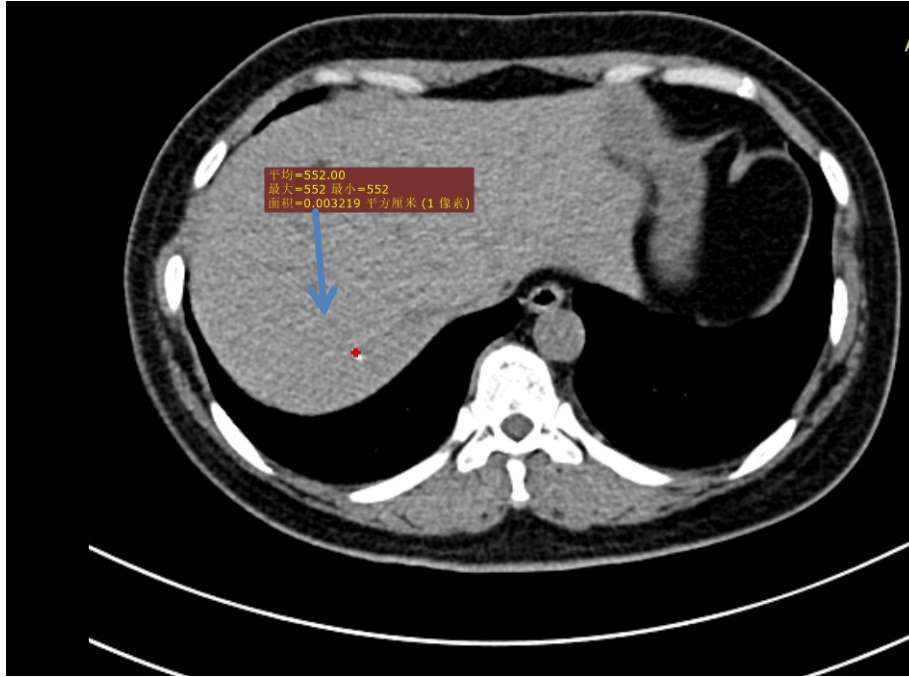

**Fig.S3.** CT of calcification in patient 1's liver

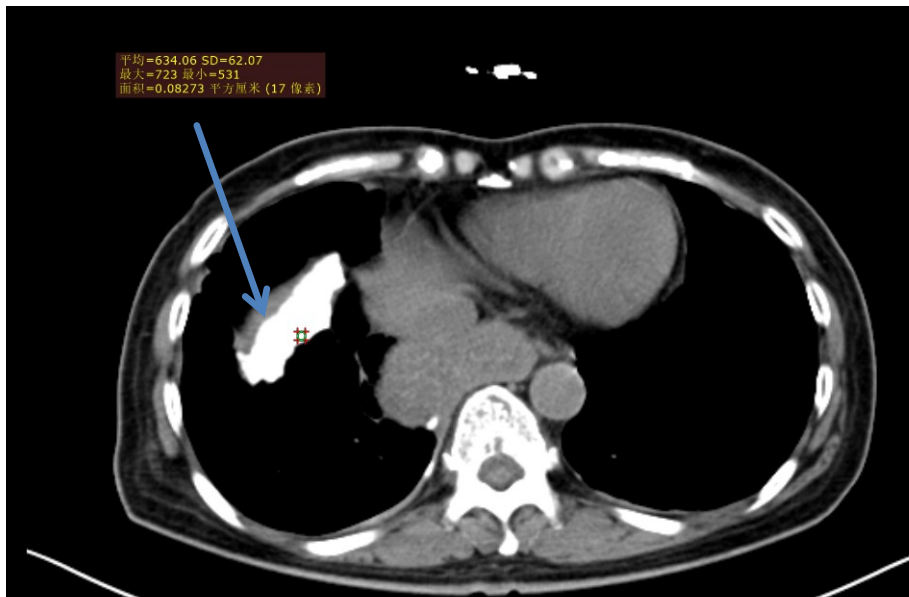

**Fig.S4.** CT of calcification in patient 2's liver

The CT value of the liver calcification foci in Figs.S3-S4 are about 500-630HU. Therefore, in the comparison of several modified materials, PVC material No. 3 and No. 4 (the same kind) is superior to several other materials in the matching degree of process and CT value. Figs.S3-S4. are calcium visceral calcification foci were provided for two patients, one with 634HU and one with 552HU. Therefore, the selection of modified PVC materials 600-700HU can better simulate the focal part of the tissue.

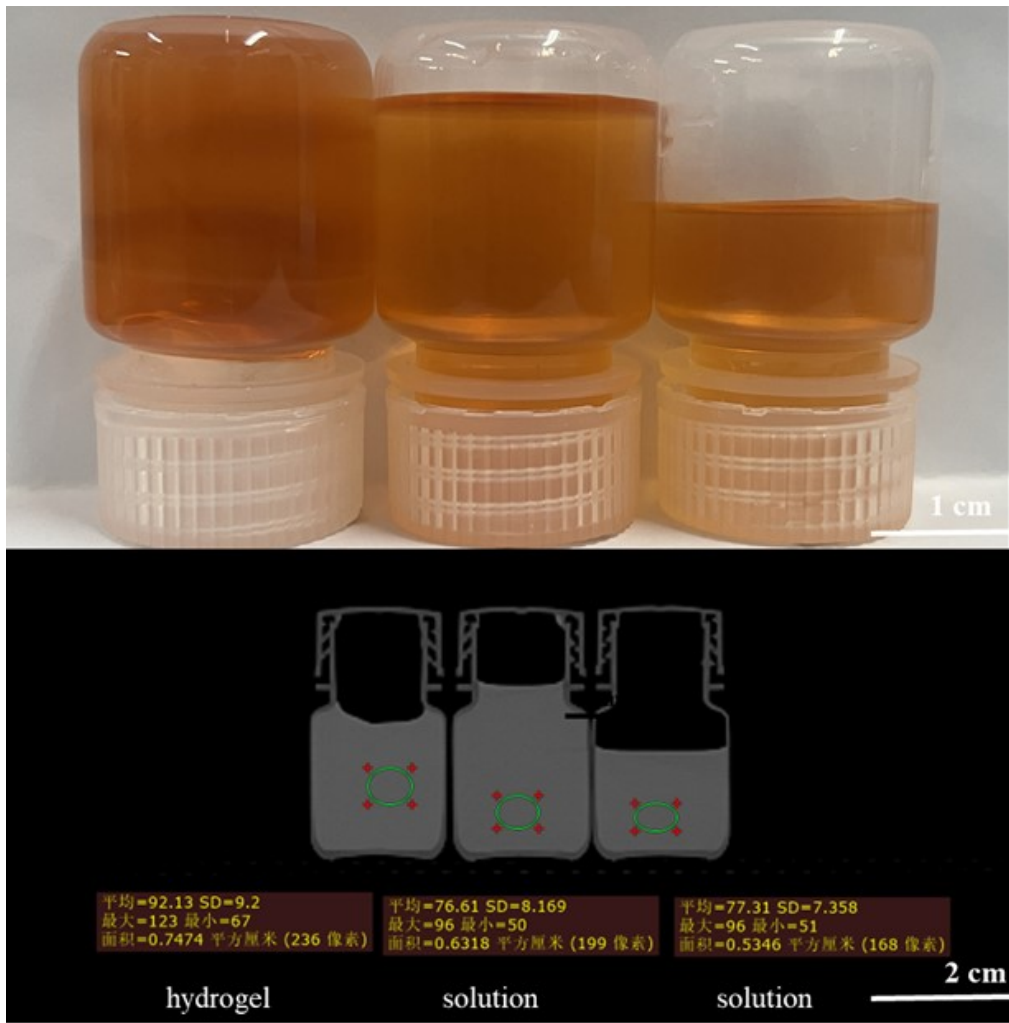

**Fig.S5.** The influence of the structure of the hydrogel network on the CT value, the left is hydrogel, and the right is aqueous solution with equal concentration.

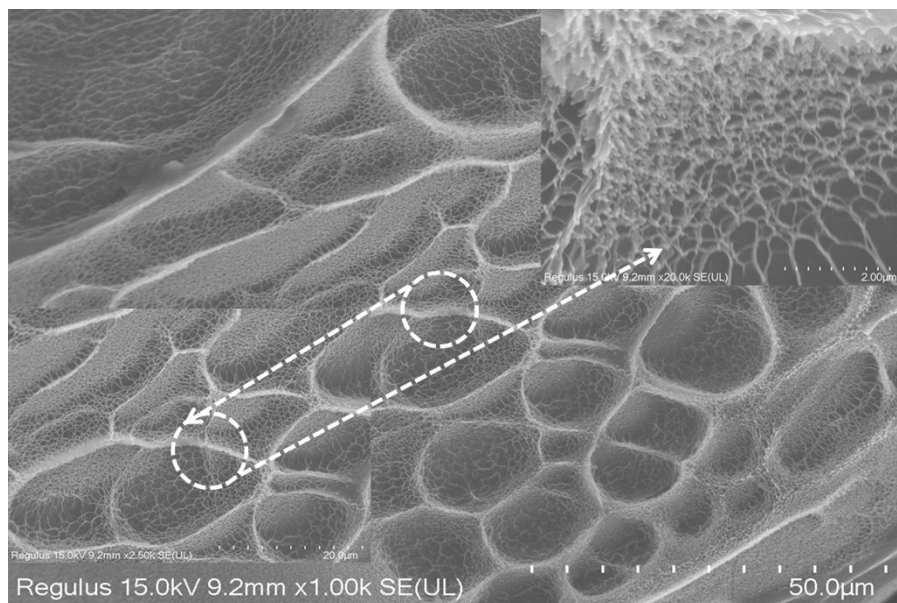

**Fig.S6.** SEM of hydrogel network with calcium concentration of 3.313wt%.

**Tab.S5.** Summary of SD values in Fig.5a, Week-1-48 Indicates the layer 48 SD value of the first entity mode in the first Week.

|            | SD (HU)    |          |
|------------|------------|----------|
|            | square 1-1 | round1-1 |
| Week-1-48  | 58.29      | 55.95    |
| Week-1-88  | 56.53      | 55.96    |
| Week-1-128 | 58.59      | 57.1     |
| Week-1-168 | 58.5       | 56.14    |
| Week-1-208 | 56.4       | 56.8     |

**Tab.S6.** Summary of SD values in Fig.5b, Week-2-48 Indicates the layer 48 SD value of the first entity mode in the second Week

|            | SD (HU) | SD (HU)    | SD (HU)  |
|------------|---------|------------|----------|
|            |         | square 1-1 | round1-1 |
| Week-2-48  |         | 54.16      | 56.11    |
| Week-2-88  |         | 52.51      | 55.27    |
| Week-2-128 |         | 55.98      | 54.22    |
| Week-2-168 |         | 55.84      | 54.48    |
| Week-2-208 |         | 56.73      | 54.44    |

**Tab.S7.** Summary of SD values in Fig.5c, Week-3-48 Indicates the layer 48 SD value of the first entity mode in the third Week

|            | SD (HU)    |          |
|------------|------------|----------|
|            | square 1-1 | round1-1 |
| Week-3-48  | 55.36      | 53.37    |
| Week-3-88  | 54.25      | 55.06    |
| Week-3-128 | 56.09      | 54.77    |
| Week-3-168 | 54.49      | 55.55    |
| Week-3-208 | 55.49      | 55.71    |

**Tab.S8.** Summary of SD values in Fig.5d, Phantom1-1 represents the SD value of the first module in the first week

|    | Phantom 1-1 | Phantom 1-2 | Phantom 1-3 | Phantom 1-4 | Phantom 1-5 |
|----|-------------|-------------|-------------|-------------|-------------|
|    | 57.662      | 57.672      | 57.786      | 58.88       | 59.94       |
| SD | 56.39       | 57.808      | 56.486      | 56.512      | 54.944      |
|    | 58.472      | 57.986      | 58.708      | 57.886      | 58.8        |
|    | 54.974      | 58.03       | 57.734      | 55.202      | 55.894      |

**Tab.S9.** Summary of SD values in Fig.5c, Phantom2-1 represents the SD value of the first module in the second week

|    | Phantom 2-1 | Phantom 2-2 | Phantom 2-3 | Phantom 2-4 | Phantom 2-5 |
|----|-------------|-------------|-------------|-------------|-------------|
|    | 55.044      | 55.362      | 55.538      | 57.728      | 56.946      |
| SD | 54.44       | 54.8        | 55.22       | 55.96       | 53.71       |
|    | 55.748      | 55.848      | 55.582      | 55.646      | 56.368      |
|    | 53.846      | 56.436      | 57.73       | 53.764      | 54.072      |

**Tab.S10.** Summary of SD values in Fig.5f, Phantom3-1 represents the SD value of the first module in the third week

|    | Phantom 3-1 | Phantom 3-2 | Phantom 3-3 | Phantom 3-4 | Phantom 3-5 |
|----|-------------|-------------|-------------|-------------|-------------|
|    | 55.136      | 54.658      | 55.416      | 56.2        | 58.426      |
| SD | 54.892      | 54.894      | 54.76       | 55.84       | 53.478      |
|    | 55.418      | 55.672      | 55.6        | 54.86       | 55.872      |
|    | 53.644      | 54.43       | 53.212      | 53.636      | 54.984      |
